# Supplementary material
Source: PubMed Central journal article supplement (PMC3631588)
Supplement: NIHMS171181-supplement-Supplemental_Web_Appendix.pdf [file NIHMS171181-supplement-Supplemental_Web_Appendix.pdf]

**Web-based Supplementary Materials for 'Identifiability and Estimation of Causal Effects in Randomized Trials with Noncompliance and Completely Non-ignorable Missing-Data' By Chen et al.**

**Appendix Web Appendix A: Proof of Theorem 1**

Identifiability of  $\xi$ ,  $\omega_a$  and  $\omega_n$  is immediate from randomization of  $Z$  and the monotonicity assumption, that is,  $\xi = P(Z = 1)$ ,  $\omega_a = P(U = a) = P(D = 1|Z = 0)$  and  $\omega_n = P(U = n) = P(D = 0|Z = 1)$ . We next show that  $\delta_{yzu}$  are the functions of the distributions of observed variables. Under the Assumption 3, we obtain that  $\delta_{y1n} = P(Y = y, R = 1|Z = 1, U = n) = \frac{P(Y=y, R=1, Z=1, D=0)}{P(Z=1, D=0)}$  and that  $\delta_{y0a} = \frac{P(Y=y, R=1, Z=0, D=1)}{P(Z=0, D=1)}$ .

$$\text{For } \delta_{y1c}, \text{ we have } \delta_{y1c} = \frac{P(Y=y, R=1, Z=1, U=c)}{P(Z=1, U=c)} = \frac{P(Y=y, R=1, Z=1, D=1) - P(Y=y, R=1, D=1, Z=1, U=a)}{P(Z=1, D=1) - P(D=1, Z=1, U=a)}.$$

Under the monotonicity and randomization assumptions,  $P(D = 1, Z = 1, U = a)$  in the denominator can be rewritten as  $P(Z = 1)P(D = 1, U = a|Z = 1) = P(Z = 1)P(U = a|Z = 1) = P(Z = 1)P(U = a|Z = 0) = P(Z = 1)P(D = 1, U = a|Z = 0) = P(Z = 1)P(D = 1|Z = 0)$ . On the other hand, from the numerator we have that  $P(Y = y, R = 1, D = 1, Z = 1, U = a) = P(R = 1|Y = y, D = 1, Z = 1, U = a)P(Y = y|D = 1, Z = 1, U = a)P(D = 1, Z = 1, U = a)$ , where  $P(R = 1|Y = y, D = 1, Z = 1, U = a) = P(R = 1|Y = y) = P(R = 1|Y = y, D = 1, Z = 0, U = a)$  because of Assumption 6,  $P(Y = y|D = 1, Z = 1, U = a) = P(Y = y|D = 1, Z = 0, U = a)$  due to the exclusion restriction and  $P(D = 1, Z = 1, U = a) = P(D = 1, U = a|Z = 0)P(Z = 1)$  by the forward proof. So  $P(Y = y, R = 1, D = 1, Z = 1, U = a) = P(R = 1|Y = y, D = 1, Z = 0, U = a)P(Y = y|D = 1, Z = 0, U = a)P(D = 1, U = a|Z = 0)P(Z = 1) = P(Y = y, R = 1, D = 1, U = a|Z = 0)P(Z = 1)$ . Hence, we obtain that  $\delta_{y1c} = \frac{P(Y=y, R=1, Z=1, D=1) - P(Y=y, R=1, D=1|Z=0)P(Z=1)}{P(Z=1, D=1) - P(D=1|Z=0)P(Z=1)}$ .

Similarly, we can show that  $\delta_{y0c} = \frac{P(Y=y, R=1, Z=0, D=0) - P(Y=y, R=1, D=0|Z=1)P(Z=0)}{P(Z=0, D=0) - P(D=0|Z=1)P(Z=0)}$ . Hence, we have shown that  $\delta_{yzu}$ 's are identifiable.

Next we will show that  $\rho_y$ 's are identifiable. Let us define the matrix  $\underline{\Delta}^1$  as follows:

$$\underline{\Delta}^1 = \begin{pmatrix} \delta_{01n} & \delta_{00a} & \delta_{01c} & \delta_{00c} \\ \delta_{11n} & \delta_{10a} & \delta_{11c} & \delta_{10c} \end{pmatrix}^T.$$

Because  $\theta_{0zu} + \theta_{1zu} = 1$  and from  $\delta_{yzu} = \rho_y \theta_{yzu}$ , we obtain the following equations:

$$\underline{\Delta}^1 \begin{pmatrix} 1/\rho_0 \\ 1/\rho_1 \end{pmatrix} = \begin{pmatrix} 1 & 1 & 1 & 1 \end{pmatrix}^T. \quad (\text{A.1})$$

Below we show that  $\underline{\Delta}^1$  has rank 2. Suppose that  $\underline{\Delta}^1$  does not have full column rank. Then we have  $\frac{\delta_{01n}}{\delta_{11n}} = \frac{\delta_{00a}}{\delta_{10a}} = \frac{\delta_{01c}}{\delta_{11c}} = \frac{\delta_{00c}}{\delta_{10c}}$ , which implies  $\frac{\theta_{01n}}{\theta_{11n}} = \frac{\theta_{00a}}{\theta_{10a}} = \frac{\theta_{01c}}{\theta_{11c}} = \frac{\theta_{00c}}{\theta_{10c}}$  since  $\delta_{yzu} = \rho_y \theta_{yzu}$ . Thus we obtain that  $\theta_{10a} = \theta_{11n} = \theta_{11c} = \theta_{10c}$ , which implies that  $Y$  is independent of  $Z$  given  $U$  and is also independent of  $U$  given  $Z$ . This contradicts the condition of Theorem 1. Therefore, we have shown that  $\rho_y$ 's are identifiable. Finally, the parameters  $\theta_{yzu}$  can be identified from equations:  $\theta_{10n} = \theta_{11n} = \delta_{11n}/\rho_1$ ,  $\theta_{11a} = \theta_{10a} = \delta_{10a}/\rho_1$ ,  $\theta_{11c} = \delta_{11c}/\rho_1$  and  $\theta_{10c} = \delta_{10c}/\rho_1$ .

## Appendix Web Appendix B: Moment Estimators under the Model specified in Theorem 1

**COROLLARY 1:** *Under the assumptions of Theorem 1, the moment estimator,  $\hat{\theta}$ , of the parameter vector  $\theta$  is given as follows: for  $y = 0$  and 1,  $\hat{\delta}_{y1n} = \frac{N_{y110}}{N_{++10}}$ ,  $\hat{\delta}_{y0a} = \frac{N_{y101}}{N_{++01}}$ ,*

$$\hat{\delta}_{y1c} = \frac{N_{y111} - N_{y101} \frac{N_{++1+}}{N_{++0+}}}{N_{++11} - N_{++01} \frac{N_{++1+}}{N_{++0+}}}, \quad \hat{\delta}_{y0c} = \frac{N_{y100} - N_{y110} \frac{N_{++0+}}{N_{++1+}}}{N_{++00} - N_{++10} \frac{N_{++0+}}{N_{++1+}}}.$$

$\hat{\xi} = \frac{N_{++1+}}{N}$ ,  $\hat{\omega}_a = \frac{N_{++01}}{N_{++0+}}$ ,  $\hat{\omega}_n = \frac{N_{++10}}{N_{++1+}}$ ,  $\hat{\theta}_{10a} = \frac{\hat{\delta}_{10a}}{\hat{\rho}_1}$ ,  $\hat{\theta}_{11n} = \frac{\hat{\delta}_{11n}}{\hat{\rho}_1}$ ,  $\hat{\theta}_{11c} = \frac{\hat{\delta}_{11c}}{\hat{\rho}_1}$ ,  $\hat{\theta}_{10c} = \frac{\hat{\delta}_{10c}}{\hat{\rho}_1}$ . Here

$\hat{\rho}_0$  and  $\hat{\rho}_1$  are computed as follows:

(1) if  $P(Y = 1|Z = 1, U = n) \neq P(Y = 1|Z = 1, U = a)$  (i.e.  $\theta_{11n} \neq \theta_{10a}$ ), then  $\hat{\rho}_0 =$

$$\frac{\hat{\delta}_{01n} \hat{\delta}_{10a} - \hat{\delta}_{11n} \hat{\delta}_{00a}}{\hat{\delta}_{10a} - \hat{\delta}_{11n}}, \quad \hat{\rho}_1 = \frac{\hat{\delta}_{01n} \hat{\delta}_{10a} - \hat{\delta}_{11n} \hat{\delta}_{00a}}{\hat{\delta}_{01n} - \hat{\delta}_{00a}};$$

(2) if  $P(Y = 1|Z = 1, U = n) = P(Y = 1|Z = 1, U = a)$  (i.e.  $\theta_{11n} = \theta_{10a}$ ) and  $P(Y = 1|Z =$

- 1, U = c)  $\neq$  P(Y = 1|Z = 0, U = c) (i.e.  $\theta_{11c} \neq \theta_{10c}$ ), then  $\hat{\rho}_0 = \frac{\hat{\delta}_{01c}\hat{\delta}_{10c}-\hat{\delta}_{11c}\hat{\delta}_{00c}}{\hat{\delta}_{10c}-\hat{\delta}_{11c}}$ ,  $\hat{\rho}_1 = \frac{\hat{\delta}_{01c}\hat{\delta}_{10c}-\hat{\delta}_{11c}\hat{\delta}_{00c}}{\hat{\delta}_{01c}-\hat{\delta}_{00c}}$ ;
- (3) if P(Y = 1|Z = 1, U = n) = P(Y = 1|Z = 1, U = a) (i.e.  $\theta_{11n} = \theta_{10a}$ ) and P(Y = 1|Z = 1, U = c) = P(Y = 1|Z = 0, U = c) (i.e.  $\theta_{11c} = \theta_{10c}$ ), then  $\hat{\rho}_0 = \frac{\hat{\delta}_{01n}\hat{\delta}_{10c}-\hat{\delta}_{11n}\hat{\delta}_{00c}}{\hat{\delta}_{10c}-\hat{\delta}_{11n}}$ ,  $\hat{\rho}_1 = \frac{\hat{\delta}_{01n}\hat{\delta}_{10c}-\hat{\delta}_{11n}\hat{\delta}_{00c}}{\hat{\delta}_{01n}-\hat{\delta}_{00c}}$ .

## Appendix Web Appendix C: The EM algorithm under the assumptions in

### Theorem 1

Let  $\theta^{(k)} = (\omega_a^{(k)}, \omega_n^{(k)}, \theta_{10a}^{(k)}, \theta_{11n}^{(k)}, \theta_{11c}^{(k)}, \theta_{10c}^{(k)}, \rho_0^{(k)}, \rho_1^{(k)})$  be the estimate of  $\theta$  after the  $k$ th iteration in the EM algorithm. Define  $\pi_0^{(k)} = (\omega_n^{(k)}\theta_{10n}^{(k)} + (1 - \omega_n^{(k)} - \omega_a^{(k)})\theta_{10c}^{(k)})(1 - \rho_1^{(k)}) + (\omega_n^{(k)}(1 - \theta_{10n}^{(k)})) + (1 - \omega_n^{(k)} - \omega_a^{(k)})(1 - \theta_{10c}^{(k)})(1 - \rho_0^{(k)})$ ,  $\pi_1^{(k)} = (\omega_a^{(k)}\theta_{11a}^{(k)} + (1 - \omega_n^{(k)} - \omega_a^{(k)})\theta_{11c}^{(k)})(1 - \rho_1^{(k)}) + (\omega_a^{(k)}(1 - \theta_{11a}^{(k)})) + (1 - \omega_n^{(k)} - \omega_a^{(k)})(1 - \theta_{11c}^{(k)})(1 - \rho_0^{(k)})$ , and  $n_{yrzu} = \#of(Y = y, R = r, Z = z, U = t)$ .

Then the next iteration estimate  $\theta^{(k+1)}$  of  $\theta$  in the EM algorithm is given as follow:

$$\begin{aligned}
n_{110n}^{(k+1)} &= N_{1100} \frac{\omega_n^{(k)}\theta_{10n}^{(k)}\rho_1^{(k)}}{\omega_n^{(k)}\theta_{10n}^{(k)}\rho_1^{(k)} + (1 - \omega_n^{(k)} - \omega_a^{(k)})\theta_{10c}^{(k)}\rho_1^{(k)}}, n_{110c}^{(k+1)} = N_{1100} - n_{110n}^{(k+1)}, \\
n_{010n}^{(k+1)} &= N_{0100} \frac{\omega_n^{(k)}(1 - \theta_{10n}^{(k)})\rho_0^{(k)}}{\omega_n^{(k)}(1 - \theta_{10n}^{(k)})\rho_0^{(k)} + (1 - \omega_n^{(k)} - \omega_a^{(k)})(1 - \theta_{10c}^{(k)})\rho_0^{(k)}}, n_{010c}^{(k+1)} = N_{0100} - n_{010n}^{(k+1)}, \\
n_{111n}^{(k+1)} &= N_{1110}, n_{011n}^{(k+1)} = N_{0110}, n_{110a}^{(k+1)} = N_{1101}, n_{010a}^{(k+1)} = N_{0101}, \\
n_{111a}^{(k+1)} &= N_{1111} \frac{\omega_a^{(k)}\theta_{11a}^{(k)}\rho_1^{(k)}}{\omega_a^{(k)}\theta_{11a}^{(k)}\rho_1^{(k)} + (1 - \omega_n^{(k)} - \omega_a^{(k)})\theta_{11c}^{(k)}\rho_1^{(k)}}, n_{111c}^{(k+1)} = N_{1111} - n_{111a}^{(k+1)}, \\
n_{011a}^{(k+1)} &= N_{0111} \frac{\omega_a^{(k)}(1 - \theta_{11a}^{(k)})\rho_0^{(k)}}{\omega_a^{(k)}(1 - \theta_{11a}^{(k)})\rho_0^{(k)} + (1 - \omega_n^{(k)} - \omega_a^{(k)})(1 - \theta_{11c}^{(k)})\rho_0^{(k)}}, n_{011c}^{(k+1)} = N_{0111} - n_{011a}^{(k+1)}, \\
n_{100n}^{(k+1)} &= N_{+000} \frac{\omega_n^{(k)}\theta_{10n}^{(k)}(1 - \rho_1^{(k)})}{\pi_0^{(k)}}, n_{100c}^{(k+1)} = N_{+000} \frac{(1 - \omega_n^{(k)} - \omega_a^{(k)})\theta_{10c}^{(k)}(1 - \rho_1^{(k)})}{\pi_0^{(k)}}, \\
n_{000n}^{(k+1)} &= N_{+000} \frac{\omega_n^{(k)}(1 - \theta_{10n}^{(k)})(1 - \rho_0^{(k)})}{\pi_0^{(k)}}, n_{000c}^{(k+1)} = N_{+000} \frac{(1 - \omega_n^{(k)} - \omega_a^{(k)})(1 - \theta_{10c}^{(k)})(1 - \rho_0^{(k)})}{\pi_0^{(k)}}, \\
n_{101n}^{(k+1)} &= N_{+010} \frac{\theta_{11n}^{(k)}(1 - \rho_1^{(k)})}{\theta_{11n}^{(k)}(1 - \rho_1^{(k)}) + (1 - \theta_{11n}^{(k)})(1 - \rho_0^{(k)})}, n_{001n}^{(k+1)} = N_{+010} - n_{101n}^{(k+1)}, \\
n_{100a}^{(k+1)} &= N_{+001} \frac{\theta_{10a}^{(k)}(1 - \rho_1^{(k)})}{\theta_{10a}^{(k)}(1 - \rho_1^{(k)}) + (1 - \theta_{10a}^{(k)})(1 - \rho_0^{(k)})}, n_{000a}^{(k+1)} = N_{+001} - n_{100a}^{(k+1)}, \\
n_{101a}^{(k+1)} &= N_{+011} \frac{\omega_a^{(k)}\theta_{11a}^{(k)}(1 - \rho_1^{(k)})}{\pi_1^{(k)}}, n_{101c}^{(k+1)} = N_{+011} \frac{(1 - \omega_n^{(k)} - \omega_a^{(k)})\theta_{11c}^{(k)}(1 - \rho_1^{(k)})}{\pi_1^{(k)}}, \\
n_{001a}^{(k+1)} &= N_{+011} \frac{\omega_a^{(k)}(1 - \theta_{11a}^{(k)})(1 - \rho_0^{(k)})}{\pi_1^{(k)}}, n_{001c}^{(k+1)} = N_{+011} \frac{(1 - \omega_n^{(k)} - \omega_a^{(k)})(1 - \theta_{11c}^{(k)})(1 - \rho_0^{(k)})}{\pi_1^{(k)}}, \\
\omega_a^{(k+1)} &= \frac{n_{000a}^{(k+1)} + n_{001a}^{(k+1)} + n_{010a}^{(k+1)} + n_{011a}^{(k+1)} + n_{100a}^{(k+1)} + n_{101a}^{(k+1)} + n_{110a}^{(k+1)} + n_{111a}^{(k+1)}}{N},
\end{aligned}$$

$$\begin{aligned}
\omega_n^{(k+1)} &= \frac{n_{000n}^{(k+1)} + n_{001n}^{(k+1)} + n_{010n}^{(k+1)} + n_{011n}^{(k+1)} + n_{100n}^{(k+1)} + n_{101n}^{(k+1)} + n_{110n}^{(k+1)} + n_{111n}^{(k+1)}}{N}, \\
\theta_{10a}^{(k+1)} &= \frac{n_{100a}^{(k+1)} + n_{101a}^{(k+1)} + n_{110a}^{(k+1)} + n_{111a}^{(k+1)}}{n_{000a}^{(k+1)} + n_{001a}^{(k+1)} + n_{010a}^{(k+1)} + n_{011a}^{(k+1)} + n_{100a}^{(k+1)} + n_{101a}^{(k+1)} + n_{110a}^{(k+1)} + n_{111a}^{(k+1)}}, \\
\theta_{11n}^{(k+1)} &= \frac{n_{100n}^{(k+1)} + n_{101n}^{(k+1)} + n_{110n}^{(k+1)} + n_{111n}^{(k+1)}}{n_{000n}^{(k+1)} + n_{001n}^{(k+1)} + n_{010n}^{(k+1)} + n_{011n}^{(k+1)} + n_{100n}^{(k+1)} + n_{101n}^{(k+1)} + n_{110n}^{(k+1)} + n_{111n}^{(k+1)}}, \\
\theta_{11c}^{(k+1)} &= \frac{n_{101c}^{(k+1)} + n_{111c}^{(k+1)}}{n_{101c}^{(k+1)} + n_{111c}^{(k+1)} + n_{001c}^{(k+1)} + n_{011c}^{(k+1)}}, \theta_{10c}^{(k+1)} = \frac{n_{100c}^{(k+1)} + n_{110c}^{(k+1)}}{n_{100c}^{(k+1)} + n_{110c}^{(k+1)} + n_{000c}^{(k+1)} + n_{010c}^{(k+1)}}, \\
\rho_0^{(k+1)} &= \frac{n_{010n}^{(k+1)} + n_{011n}^{(k+1)} + n_{010a}^{(k+1)} + n_{011a}^{(k+1)} + n_{010c}^{(k+1)} + n_{011c}^{(k+1)}}{D_0}, \\
\rho_1^{(k+1)} &= \frac{n_{110n}^{(k+1)} + n_{111n}^{(k+1)} + n_{110a}^{(k+1)} + n_{111a}^{(k+1)} + n_{110c}^{(k+1)} + n_{111c}^{(k+1)}}{D_1}, \text{ where } n_{y_rzt}^{(k+1)} = E(n_{y_rzt} \mid \text{observed data}, \theta = \\
&\theta^{(k)}), D_0 = n_{010n}^{(k+1)} + n_{011n}^{(k+1)} + n_{010a}^{(k+1)} + n_{011a}^{(k+1)} + n_{010c}^{(k+1)} + n_{011c}^{(k+1)} + n_{000n}^{(k+1)} + n_{001n}^{(k+1)} + n_{000a}^{(k+1)} + \\
&n_{001a}^{(k+1)} + n_{000c}^{(k+1)} + n_{001c}^{(k+1)}, D_1 = n_{110n}^{(k+1)} + n_{111n}^{(k+1)} + n_{110a}^{(k+1)} + n_{111a}^{(k+1)} + n_{110c}^{(k+1)} + n_{111c}^{(k+1)} + n_{100n}^{(k+1)} + \\
&n_{101n}^{(k+1)} + n_{100a}^{(k+1)} + n_{101a}^{(k+1)} + n_{100c}^{(k+1)} + n_{101c}^{(k+1)}.
\end{aligned}$$

*Proof.* Let  $n_{y_rzt} = \sum_{i=1}^N I_{\{Y_i=y, R_i=r, Z_i=z, U_i=u\}}$ . The complete-data likelihood function is given as follows:

$L_c(\theta) = \prod_{i=1}^N P(Z_i)P(U_i)P(D_i|Z_i, U_i)P(Y_i|Z_i, U_i)P(R_i|Y_i)$ , where  $P(Z_i = 1) = \xi$  can be dropped during the EM steps. Then the complete-data log-likelihood function is given as follows:

$$\begin{aligned}
l_c(\theta) &= n_{110n} \log(\omega_n \theta_{10n} \rho_1) + n_{110c} \log((1 - \omega_n - \omega_a) \theta_{10c} \rho_1) \\
&+ n_{010n} \log(\omega_n (1 - \theta_{10n}) \rho_0) + n_{010c} \log((1 - \omega_n - \omega_a) (1 - \theta_{10c}) \rho_0) \\
&+ n_{111n} \log(\omega_n \theta_{11n} \rho_1) + n_{011n} \log(\omega_n (1 - \theta_{11n}) \rho_0) + n_{110a} \log(\omega_a \theta_{10a} \rho_1) \\
&+ n_{010a} \log(\omega_a (1 - \theta_{10a}) \rho_0) + n_{111a} \log(\omega_a \theta_{11a} \rho_1) + n_{111c} \log((1 - \omega_n - \omega_a) \theta_{11c} \rho_1) \\
&+ n_{011a} \log(\omega_a (1 - \theta_{11a}) \rho_0) + n_{011c} \log((1 - \omega_n - \omega_a) (1 - \theta_{11c}) \rho_0) \\
&+ n_{100n} \log(\omega_n \theta_{10n} (1 - \rho_1)) + n_{100c} \log((1 - \omega_n - \omega_a) \theta_{10c} (1 - \rho_1)) \\
&+ n_{000n} \log(\omega_n (1 - \theta_{10n}) (1 - \rho_0)) + n_{000c} \log((1 - \omega_n - \omega_a) (1 - \theta_{10c}) (1 - \rho_0)) \\
&+ n_{101n} \log(\omega_n \theta_{11n} (1 - \rho_1)) + n_{001n} \log(\omega_n (1 - \theta_{11n}) (1 - \rho_0)) \\
&+ n_{100a} \log(\omega_a \theta_{10a} (1 - \rho_1)) + n_{000a} \log(\omega_a (1 - \theta_{10a}) (1 - \rho_0)) \\
&+ n_{101a} \log(\omega_a \theta_{11a} (1 - \rho_1)) + n_{101c} \log((1 - \omega_n - \omega_a) \theta_{11c} (1 - \rho_1)) \\
&+ n_{001a} \log(\omega_a (1 - \theta_{11a}) (1 - \rho_0)) + n_{001c} \log((1 - \omega_n - \omega_a) (1 - \theta_{11c}) (1 - \rho_0)). \text{ In the E step, we}
\end{aligned}$$

take the expectation of the complete-data log-likelihood, given the observed data and the previous parameter estimate  $\theta = \theta^{(k)}$ , that is  $n_{yrzu}^{(k+1)} = E[n_{yrzu} | \text{observed} - \text{data}, \theta^{(k)}]$ . In the M step, we can solve following functions and get the estimates.

$$\begin{aligned} \frac{\partial l}{\partial \omega_a} &= \frac{n_{000a}^{(k+1)} + n_{001a}^{(k+1)} + n_{010a}^{(k+1)} + n_{011a}^{(k+1)} + n_{100a}^{(k+1)} + n_{101a}^{(k+1)} + n_{110a}^{(k+1)} + n_{111a}^{(k+1)}}{\omega_a} \\ &\quad - \frac{n_{000c}^{(k+1)} + n_{001c}^{(k+1)} + n_{010c}^{(k+1)} + n_{011c}^{(k+1)} + n_{100c}^{(k+1)} + n_{101c}^{(k+1)} + n_{110c}^{(k+1)} + n_{111c}^{(k+1)}}{1 - \omega_n - \omega_a}, \\ \frac{\partial l}{\partial \omega_n} &= \frac{n_{000n}^{(k+1)} + n_{001n}^{(k+1)} + n_{010n}^{(k+1)} + n_{011n}^{(k+1)} + n_{100n}^{(k+1)} + n_{101n}^{(k+1)} + n_{110n}^{(k+1)} + n_{111n}^{(k+1)}}{\omega_n} \\ &\quad - \frac{n_{000c}^{(k+1)} + n_{001c}^{(k+1)} + n_{010c}^{(k+1)} + n_{011c}^{(k+1)} + n_{100c}^{(k+1)} + n_{101c}^{(k+1)} + n_{110c}^{(k+1)} + n_{111c}^{(k+1)}}{1 - \omega_n - \omega_a}, \\ \frac{\partial l}{\partial \theta_{10a}} &= \frac{n_{100a}^{(k+1)} + n_{101a}^{(k+1)} + n_{110a}^{(k+1)} + n_{111a}^{(k+1)}}{\theta_{10a}} \\ &\quad - \frac{n_{000a}^{(k+1)} + n_{001a}^{(k+1)} + n_{010a}^{(k+1)} + n_{011a}^{(k+1)}}{1 - \theta_{10a}}, \\ \frac{\partial l}{\partial \theta_{11n}} &= \frac{n_{100n}^{(k+1)} + n_{101n}^{(k+1)} + n_{110n}^{(k+1)} + n_{111n}^{(k+1)}}{\theta_{11n}} \\ &\quad - \frac{n_{000n}^{(k+1)} + n_{001n}^{(k+1)} + n_{010n}^{(k+1)} + n_{011n}^{(k+1)}}{1 - \theta_{11n}}, \\ \frac{\partial l}{\partial \theta_{11c}} &= \frac{n_{101c}^{(k+1)} + n_{111c}^{(k+1)}}{\theta_{11c}} - \frac{n_{001c}^{(k+1)} + n_{011c}^{(k+1)}}{1 - \theta_{11c}}, \quad \frac{\partial l}{\partial \theta_{10c}} = \frac{n_{100c}^{(k+1)} + n_{110c}^{(k+1)}}{\theta_{10c}} - \frac{n_{000c}^{(k+1)} + n_{010c}^{(k+1)}}{1 - \theta_{10c}}, \\ \frac{\partial l}{\partial \rho_0} &= \frac{n_{010n}^{(k+1)} + n_{011n}^{(k+1)} + n_{010a}^{(k+1)} + n_{011a}^{(k+1)} + n_{010c}^{(k+1)} + n_{011c}^{(k+1)}}{\rho_0} \\ &\quad - \frac{n_{000n}^{(k+1)} + n_{001n}^{(k+1)} + n_{000a}^{(k+1)} + n_{001a}^{(k+1)} + n_{000c}^{(k+1)} + n_{001c}^{(k+1)}}{1 - \rho_0}, \\ \frac{\partial l}{\partial \rho_1} &= \frac{n_{110n}^{(k+1)} + n_{111n}^{(k+1)} + n_{110a}^{(k+1)} + n_{111a}^{(k+1)} + n_{110c}^{(k+1)} + n_{111c}^{(k+1)}}{\rho_1} \\ &\quad - \frac{n_{100n}^{(k+1)} + n_{101n}^{(k+1)} + n_{100a}^{(k+1)} + n_{101a}^{(k+1)} + n_{100c}^{(k+1)} + n_{101c}^{(k+1)}}{1 - \rho_1}. \end{aligned}$$

## Appendix Web Appendix B: Proof of Theorem 2

The joint distribution can be factorized as  $P(Z, U, D, X, Y, R) = P(R|Z, U, D, X, Y) P(Y|Z, U, D, X) P(D|Z, U, X) P(U, X|Z) P(Z)$ . Since  $Z$  is randomized,  $P(U, X|Z) = P(U, X)$ . Because  $D$  is determined by  $(Z, U)$ , we obtain that  $P(D|Z, U, X) = P(D|Z, U)$  and  $P(Y|Z, U, D, X) = P(Y|Z, U, X)$ . From the randomization assumption and Assumption 7, we obtain that  $P(R|Z, U, D, X, Y) = P(R|Y, Z)$ . So we can rewrite the joint distribution as

$$P(Z, U, D, X, Y, R) = P(Z)P(U, X)P(D|Z, U)P(Y|Z, U, X)P(R|Y, Z).$$

To identify  $P(U, X)$ , we first note that from independence of  $Z$  and  $(U, X)$ , the definition of  $U$ , and Assumption 3, we obtain that  $P(U = a|X = x) = P(U = a|Z = 0, X = x) = P(D = 1|Z = 0, X = x)$ ,  $P(U = n|X = x) = P(U = n|Z = 1, X = x) = P(D = 0|Z = 1, X = x)$  and then  $P(U = c|X = x) = 1 - \{P(U = n|X = x) + P(U = a|X = x)\}$ . Since  $P(X)$  is identifiable,  $P(U, X)$  is identifiable; since  $Z$  and  $U$  determine  $D$ ,  $P(D|Z = z, U = u)$  is known for all  $z$  and  $u$ .

Below we show that  $\rho_{01}$ ,  $\rho_{11}$ ,  $\rho_{00}$ ,  $\rho_{10}$ ,  $\theta_{11nx}$ ,  $\theta_{10ax}$ ,  $\theta_{11cx}$  and  $\theta_{10cx}$  are identifiable conditionally on  $X = x$ . Let us define the following matrices:

$$\underline{\Delta}_{zu}^2 = \begin{pmatrix} \delta_{0zux} & \delta_{1zux} \\ \delta_{0zux'} & \delta_{1zux'} \end{pmatrix}$$

Since

$$\delta_{yzux} = P(R = 1|Y = y, Z = z)P(Y = y|Z = z, U = u, X = x) = \rho_{yz}\theta_{yzux}, \quad (\text{A.2})$$

using the same idea as in the proof of Theorem 1, we obtain the following equations:

$$\underline{\Delta}_{1n}^2 \begin{pmatrix} 1/\rho_{01} \\ 1/\rho_{11} \end{pmatrix} = \begin{pmatrix} 1 \\ 1 \end{pmatrix} \quad (\text{A.3})$$

and

$$\underline{\Delta}_{0a}^2 \begin{pmatrix} 1/\rho_{00} \\ 1/\rho_{10} \end{pmatrix} = \begin{pmatrix} 1 \\ 1 \end{pmatrix}. \quad (\text{A.4})$$

Under Assumption 3, the elements in the matrices  $\underline{\Delta}_{1n}^2$  and  $\underline{\Delta}_{0a}^2$  can be expressed by the distributions of observed variables, respectively, as follows:

$$\delta_{y1nx} = \frac{P(Y = y, R = 1, Z = 1, D = 0, X = x)}{P(Z = 1, D = 0, X = x)} \quad (\text{A.5})$$

and

$$\delta_{y0ax} = \frac{P(Y = y, R = 1, Z = 0, D = 1, X = x)}{P(Z = 0, D = 1, X = x)}. \quad (\text{A.6})$$

Suppose that  $\underline{\Delta}_{1n}^2$  in (A.3) is not full rank for all  $x \neq x'$ . Then it is immediate that  $Y$  is independent of  $X$  given  $U = n$  and  $Z = z$ , which contradicts the assumptions in Theorem 2.

Thus there exists at least one pair of  $x$  and  $x'$  so that the matrix  $\underline{\Delta}_{1n}^2$  is full rank, and then  $\rho_{01}$  and  $\rho_{11}$  can be solved from (A.3). Similarly, we can show that  $\rho_{00}$  and  $\rho_{10}$  are identifiable from (A.4).

From (A.2), (A.5) and (A.6), we can identify  $\theta_{y1nx}$  and  $\theta_{y0ax}$ . Similarly we can identify  $\theta_{y1cx}$  and  $\theta_{y0cx}$  from the equations  $\theta_{y1cx} = \frac{\delta_{y1cx}}{\rho_{y1}} = \frac{P(y,R=1,Z=1,D=1,x)/(\xi\rho_{y1}) - P(y,R=1,Z=0,D=1,x)/\{(1-\xi)\rho_{y0}\}}{P(Z=1,D=1,x)/\xi - P(D=1,Z=0,x)/(1-\xi)}$  and  $\theta_{y0cx} = \frac{P(y,R=1,Z=0,D=0,x)/\{(1-\xi)\rho_{y0}\} - P(y,R=1,Z=1,D=0,x)/(\xi\rho_{y1})}{P(Z=0,D=0,x)/(1-\xi) - P(D=0,Z=1,x)/\xi}$ .

### Appendix Web Appendix C: Proof of Theorem 3

Similar to the proof of Theorem 2, we have  $P(Z, U, D, X, Y, R) = P(Z)P(U, X)P(D|Z, U)P(Y|Z, U, X)P(R|Y, Z, U)$ . Hence, we can identify  $\delta_{y1nx}$  and  $\delta_{y0ax}$  from (A.5) and (A.6) respectively. We can also identify  $\delta_{y1cx}$  and  $\delta_{y0cx}$  by  $\delta_{y1cx} = \frac{P(y,R=1,Z=1,D=1,x) - P(y,R=1,D=1,Z=0,x)\xi/(1-\xi)}{P(Z=1,D=1,x) - P(D=1,Z=0,x)P(Z=1)/P(Z=0)}$  and  $\delta_{y0cx} = \frac{P(y,R=1,Z=0,D=0,x) - P(y,R=1,D=0,Z=1,x)(1-\xi)/\xi}{P(Z=0,D=0,x) - P(D=0,Z=1,x)P(Z=0)/P(Z=1)}$ .

Next we show that we can identify  $\rho_{yzu}$ . We first put  $\delta_{yzux}$ 's into the following matrices:

$$\underline{\Delta}_{zu}^3 = \begin{pmatrix} \delta_{0zux} & \delta_{1zux} \\ \delta_{0zux'} & \delta_{1zux'} \end{pmatrix},$$

for  $(z, u) = (1, n), (1, c), (0, a)$  and  $(0, c)$ . Because  $R$  is independent of  $X$  given  $(Y, Z, U)$ , we obtain that  $\delta_{yzux} = P(R = 1|Y = y, Z = z, U = u)P(Y = y|Z = z, U = u, X = x) = \rho_{yzu}\theta_{yzux}$ . Hence, we can obtain the following equations:

$$\underline{\Delta}_{zu}^3 \begin{pmatrix} 1/\rho_{0zu} \\ 1/\rho_{1zu} \end{pmatrix} = \begin{pmatrix} 1 \\ 1 \end{pmatrix}.$$

Using the same argument as in the proof of Theorem 2, we can show that all four  $\underline{\Delta}_{zu}^3$  matrices have full ranks under the assumptions in Theorem 3. Therefore, we can identify  $\rho_{yzu}$ 's. Finally, because  $\delta_{yzux} = P(R = 1|Y = y, Z = z, U = u)P(Y = y|Z = z, U = u, X = x) = \rho_{yzu}\theta_{yzux}$ , we can identify  $\theta_{10ax}, \theta_{11nx}, \theta_{11cx}$  and  $\theta_{10cx}$  respectively.
